# Supplementary material for: Effectiveness of synchronous teleconsultation for patients with type 2 diabetes mellitus: a systematic review and meta-analysis
Source: HighWire-hosted journal article supplement (doi:10.1136/bmjdrc-2022-003180), 2023-02-01
Supplement: bmjdrc-2022-003180supp001_data_supplement.pdf [file bmjdrc-2022-003180supp001_data_supplement.pdf]

**Supplementary File 1**

URL to search strategy links below

[https://www.crd.york.ac.uk/PROSPEROFILES/267019\\_STRATEGY\\_20210726.pdf](https://www.crd.york.ac.uk/PROSPEROFILES/267019_STRATEGY_20210726.pdf)

**Supplementary table 1**

**Supplementary table 1 Characteristics of interventions (n=27) ordered chronologically**

| author, year  | Providers                               | context                                                                                                                                                                                                                                                                                                       | Approach        | Monthly intervention frequency | Longest duration of intervention |
|---------------|-----------------------------------------|---------------------------------------------------------------------------------------------------------------------------------------------------------------------------------------------------------------------------------------------------------------------------------------------------------------|-----------------|--------------------------------|----------------------------------|
| Whitlock,2000 | a nurse case manager and two physicians | All diabetic care choices for patients in the intervention groups were made by two physicians. The case manager reinforced care plans with the patients and consulted with the physicians weekly.                                                                                                             | Videoconference | 4.00                           | 3 months                         |
| Oh,2003       | researcher                              | The intervention included frequent self-monitoring of blood glucose levels, as well as ongoing education and reinforcement of dietary, exercise, and medication adjustments.                                                                                                                                  | Telephone       | 5.33                           | 3 months                         |
| Kim,2003      | a nursing PhD student                   | The patient is contacted by a nursing PhD candidate. Based on the respondents' eating and activity habits, a licensed dietician examined the individuals' daily food consumption and provided suggestions for proper diabetic dietary control. The subjects were then mailed the findings and dietary advice. | Telephone       | 5.33                           | 3 months                         |
| Shea,2005     | a registered nurse                      | Registered nurses (RNs) provide telemedicine visits with remote blood pressure (BP) and blood sugar monitoring using telemedicine home units (HTU).                                                                                                                                                           | Videoconference | NA                             | 1 year                           |

|                         |                                                                           |                                                                                                                                                                                                                                                                          |           |      |                |
|-------------------------|---------------------------------------------------------------------------|--------------------------------------------------------------------------------------------------------------------------------------------------------------------------------------------------------------------------------------------------------------------------|-----------|------|----------------|
| Eakin,2009              | masters-level graduates with a background in nutrition                    | The calls covered a variety of topics, such as assessment (and feedback), suggestions for improving physical activity and food, help setting goals and creating a tailored strategy for doing so, and setting up follow-up support in the form of more phone calls.      | Telephone | NA   | 12 months      |
| Dale,2009               | a diabetic specialist nurse/peer supporter                                | When a modification is made in the patient's diabetes management (medication and/or lifestyle), motivational telephone support encourages adherence to the recommendations made by the general practitioner or practice nurse.                                           | Telephone | 0.75 | up to 6 months |
| Song,2009               | diabetes education nurse(researcher)                                      | The researcher assessed and improved patient adherence to the advised diet, exercise, and medication (dosages for which were modified by the endocrinologist), as well as suggested hospital visits. The researcher also monitored glycemic control (SMBG) and symptoms. | Telephone | 4.00 | 3 months       |
| Rodríguez-Idígoras,2009 | a physician and a nurse with expertise in diabetes and diabetes education | Transmission of blood glucose data in real-time, with prompt response as necessary, telephone consultations, telephone consultations                                                                                                                                     | Telephone | NA   | 1 year         |

|               |                                    |                                                                                                                                                                                                                                                                                                                                                                                                     |           |      |          |
|---------------|------------------------------------|-----------------------------------------------------------------------------------------------------------------------------------------------------------------------------------------------------------------------------------------------------------------------------------------------------------------------------------------------------------------------------------------------------|-----------|------|----------|
| Huizinga,2010 | nurse practitioners and dietitians | Participants received assistance from the providers with medication titration, issue identification and resolution, and self-care behaviors such as nutrition, exercise, blood glucose self-monitoring, and medication adherence.                                                                                                                                                                   | Telephone | NA   | 2 years  |
| Anderson,2010 | nurse                              | Discuss the issues brought up by the patient, including a brief clinical assessment, self-management (including diet, exercise, stress reduction, smoking cessation, readiness assessment, and development of specific self-management goals), medication adherence (including problem-solving to help with adherence), glucose monitoring, and a review of the results of home glucose monitoring. | Telephone | NA   | 1 year   |
| Nesari,2010   | nurse                              | Every time a phone call was made, participants' questions were addressed, education was reinforced, and health habits including diet, exercise, medication use, foot care, and routine blood sugar monitoring were examined. If there was non-adherence, the circumstance was examined to determine the reason and address it.                                                                      | Telephone | 5.33 | 3 months |

|                 |                 |                                                                                                                                                                                                                                                                                                                                                                                         |           |      |           |
|-----------------|-----------------|-----------------------------------------------------------------------------------------------------------------------------------------------------------------------------------------------------------------------------------------------------------------------------------------------------------------------------------------------------------------------------------------|-----------|------|-----------|
| Walker,2011     | health educator | <p>Focused first on diabetic medication compliance and secondarily on dietary and exercise modifications to promote a healthy lifestyle. Communication skills, goal setting, problem-solving, and planning ahead for medical appointments were crucial components of the intervention.</p>                                                                                              | Telephone | 0.83 | 1 year    |
| Blackberry,2013 | practice nurses | <p>With the aim of addressing lifestyle issues, medication adherence and dosage, self-monitoring of their disease, and how to take greater initiative in the therapeutic alliance with the treating doctor, the intervention provides structured telephone coaching to pre-patients.</p> <p>This facilitates appropriate intensification of medications to achieve treatment goals.</p> | Telephone | 0.47 | 15 months |
| Crowley,2013    | nurse           | <p>Phone call include behavioral and a medication management</p>                                                                                                                                                                                                                                                                                                                        | Telephone | 1.00 | 1 year    |

|                    |                                                                                     |                                                                                                                                                                                                                                                                                                                                                                                           |                 |      |            |
|--------------------|-------------------------------------------------------------------------------------|-------------------------------------------------------------------------------------------------------------------------------------------------------------------------------------------------------------------------------------------------------------------------------------------------------------------------------------------------------------------------------------------|-----------------|------|------------|
| Mons,2013          | practice nurses                                                                     | The goal of supportive telephone-based counseling is to encourage patients to change their general health behaviors while also identifying obstacles to diabetes treatment and self-management on their side and facilitating the early diagnosis of complications related to diabetes.                                                                                                   | Telephone       | 1.00 | 18 months  |
| O' Connor,2014     | a diabetes educator, nurse health manager, diabetes educator trainee, or pharmacist | A single protocol-structured phone call was made to the individual to see if they had begun taking the new medicine. The interventionist enquired into the patient's reasons for nonadherence and worked with them to identify and remove obstacles to adherence if the new medicine prescription had not been filled or had been filled but the patient was not taking it as prescribed. | Telephone       | 2.00 | 1.5 months |
| Liou,2014          | a dietitian, a nurse, and a diabetic specialist                                     | Educating the patient about their diabetes, including the importance of food, medication, and stress management.                                                                                                                                                                                                                                                                          | Videoconference | 1.00 | 6 months   |
| Eakin,2014         | counselors                                                                          | The intervention focused on behavior modification techniques and used a motivational interviewing methodology based on the social cognitive theory categories of self-efficacy, social support, and outcome expectancies.                                                                                                                                                                 | Telephone       | NA   | 18 months  |
| Rasmussen BSB,2015 | two nurses                                                                          | Following a preliminary examination in the outpatient department, the telemedicine group carried out blood pressure, cholesterol, blood sugar, and lipid monitoring and education                                                                                                                                                                                                         | Videoconference | 0.68 | 6 months   |

|                      |                                                                            |                                                                                                                                                                                                                          |                 |       |                                                                                                      |
|----------------------|----------------------------------------------------------------------------|--------------------------------------------------------------------------------------------------------------------------------------------------------------------------------------------------------------------------|-----------------|-------|------------------------------------------------------------------------------------------------------|
| Rasmussen<br>OW,2016 | inpatient clinic's<br>specially trained<br>municipal nurses<br>and doctors | Substituting home visits from a<br>visiting nurse and telemedicine<br>consults with the specialized doctor<br>for two out of every three patient<br>visits to the hospital's outpatient<br>clinic.                       | Telephone       | NA    | The study end<br>points were<br>defined as<br>complete ulcer<br>healing,<br>amputation, or<br>death. |
| Hansen,2017          | nurse                                                                      | The intervention was built on the<br>idea of empowerment and was<br>designed to help participants take<br>charge of their own illness<br>management and control.                                                         | Videoconference | 1.00  | 8 months                                                                                             |
| Jeong,2018           | physicians                                                                 | Assessed patients and prescribed<br>medicines delivered to each<br>individual's home                                                                                                                                     | Videoconference | 0.33  | 6 months                                                                                             |
| Egede,2018           | therapist                                                                  | Receive telemedicine-delivered<br>behavior activation treatment (BAT)                                                                                                                                                    | Videoconference | 4.00  | 1 year                                                                                               |
| Benson,2019          | a registered<br>dietitian/certified<br>diabetes educator                   | Provides counseling on lifestyle to<br>improve diabetes and overall<br>health                                                                                                                                            | Telephone       | 1.00  | 1 year                                                                                               |
| Lauffenburger,2019   | a trained clinical<br>pharmacist                                           | To identify patient objectives and<br>choices for improving diabetes care,<br>the intervention consisted of a two-<br>step procedure that combined brief<br>negotiated questioning and<br>collaborative decision-making. | Telephone       | 0.33  | 1 year                                                                                               |
| Duruturk,2019        | a physiotherapist                                                          | Supervising the TR group as they<br>execute 16 distinct, rhythmic<br>exercises for the lower and upper<br>limb muscles, as well as breathing<br>exercises and calisthenics.                                              | Videoconference | 12.00 | 1.5 months                                                                                           |
| Asante,2020          | a registered nurse<br>assisting a diabetes<br>specialist nurse             | Reinforce the rules by providing<br>information on foot care,<br>medication taking, food, exercise,<br>and self-monitoring of blood sugar.                                                                               | Telephone       | 5.33  | 3 months                                                                                             |

Supplementary Figure1: Forest plot of HbA1c comparison by type of providers

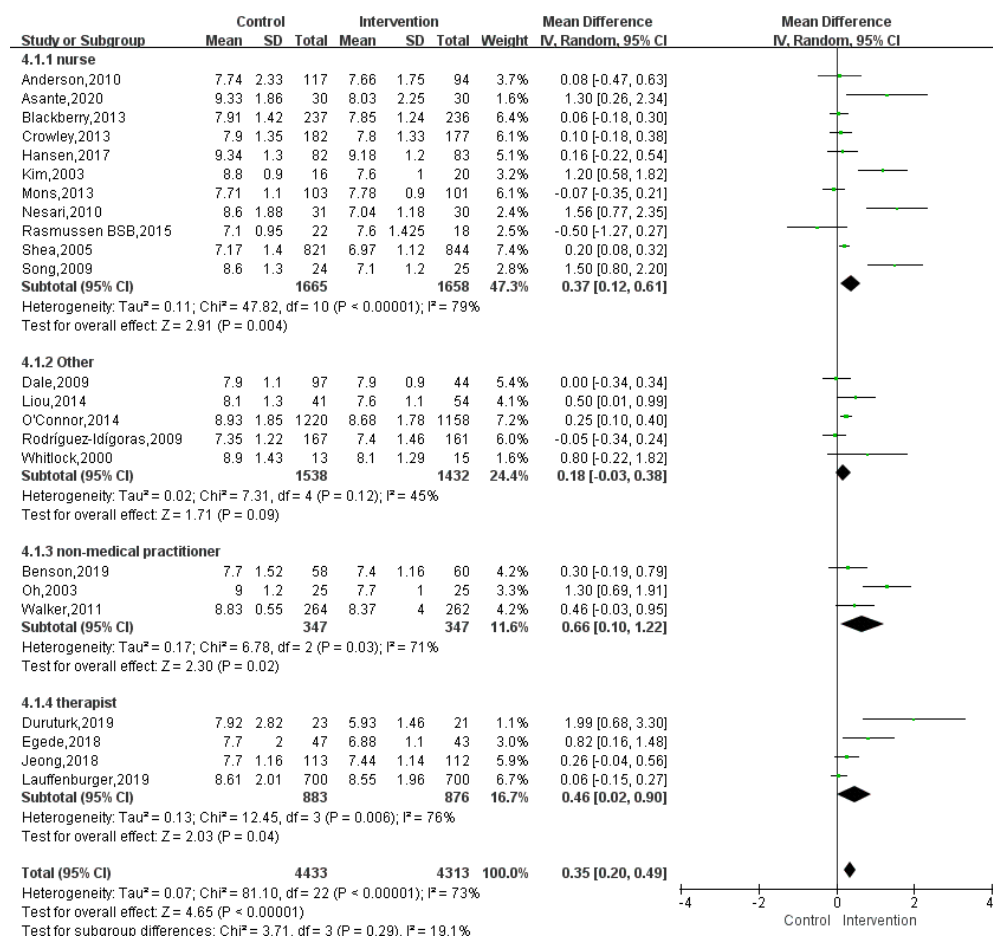

Supplementary Figure2: Forest plot of HbA1c comparison by Medium of teleconsultation

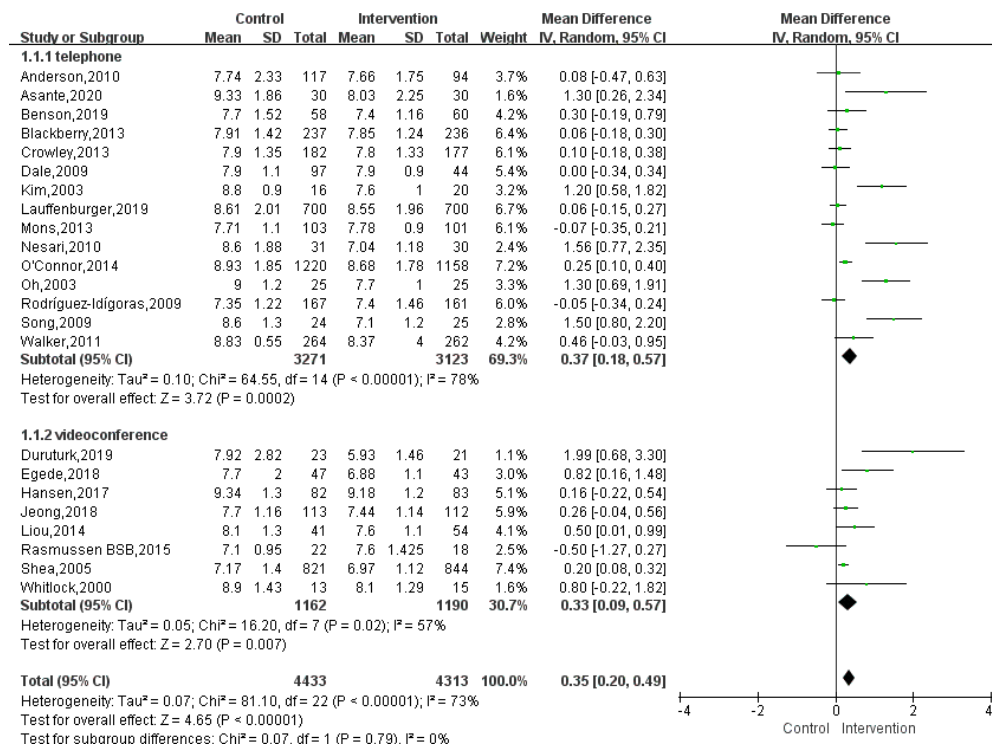

Supplementary Figure3: Forest plot of HbA1c comparison by frequency of teleconsultation

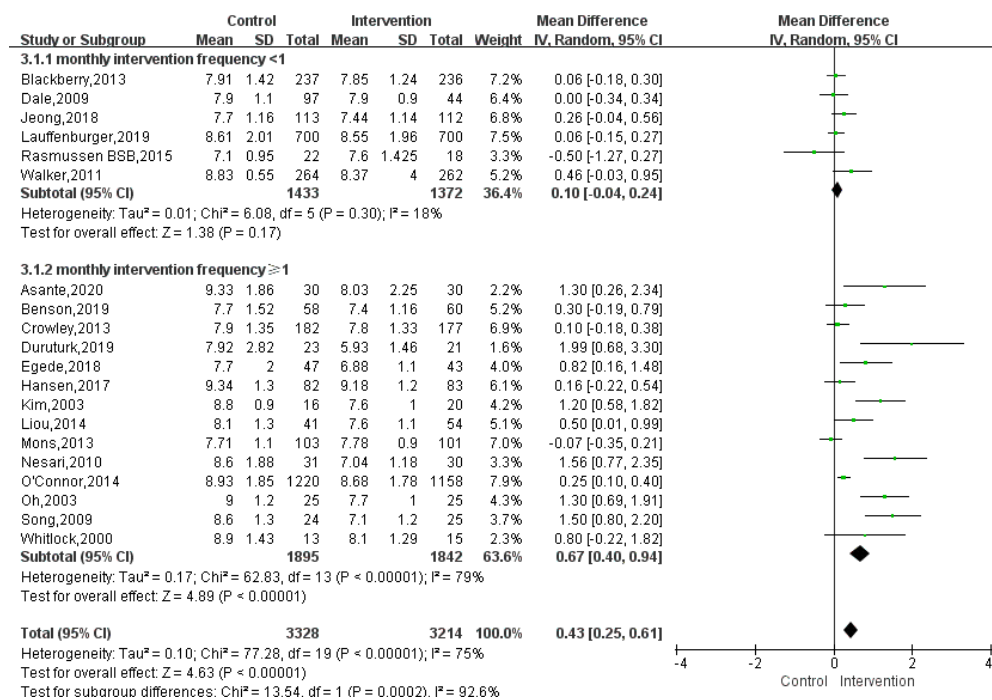



**Supplementary Figure4: Risk of bias graph**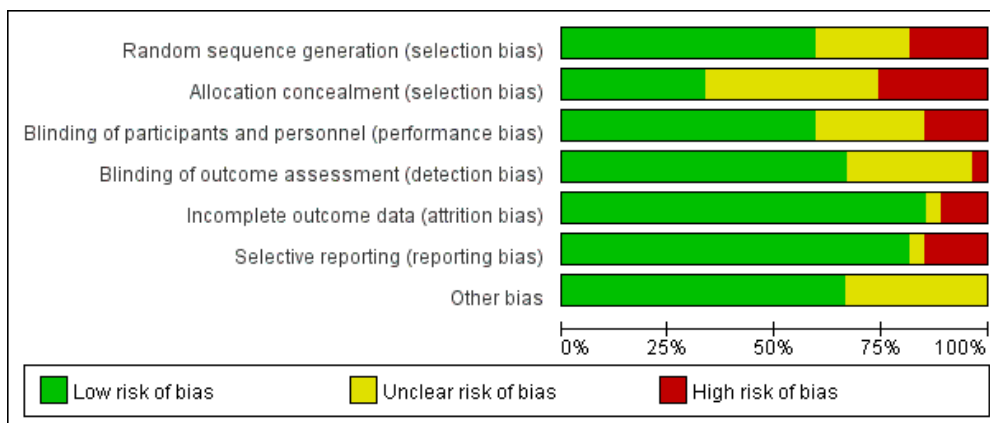**Supplementary Figure5: Risk of bias summary**

|                         | Random sequence generation (selection bias) | Allocation concealment (selection bias) | Blinding of participants and personnel (performance bias) | Blinding of outcome assessment (detection bias) | Incomplete outcome data (attrition bias) | Selective reporting (reporting bias) | Other bias |
|-------------------------|---------------------------------------------|-----------------------------------------|-----------------------------------------------------------|-------------------------------------------------|------------------------------------------|--------------------------------------|------------|
| Anderson,2010           | +                                           | ?                                       | +                                                         | ?                                               | +                                        | -                                    | +          |
| Asante,2020             | +                                           | +                                       | +                                                         | +                                               | +                                        | +                                    | +          |
| Benson,2019             | +                                           | +                                       | -                                                         | ?                                               | +                                        | +                                    | +          |
| Blackberry,2013         | +                                           | +                                       | +                                                         | +                                               | +                                        | +                                    | +          |
| Crowley,2013            | +                                           | +                                       | +                                                         | +                                               | +                                        | +                                    | +          |
| Dale,2009               | ?                                           | ?                                       | +                                                         | +                                               | +                                        | +                                    | +          |
| Duruturk,2019           | +                                           | +                                       | +                                                         | ?                                               | +                                        | +                                    | +          |
| Eakin,2009              | +                                           | -                                       | +                                                         | +                                               | +                                        | -                                    | +          |
| Eakin,2014              | +                                           | +                                       | +                                                         | +                                               | +                                        | +                                    | +          |
| Egede,2018              | ?                                           | ?                                       | +                                                         | +                                               | +                                        | +                                    | +          |
| Hansen,2017             | +                                           | +                                       | ?                                                         | +                                               | +                                        | +                                    | ?          |
| Huizinga,2010           | -                                           | -                                       | +                                                         | +                                               | -                                        | +                                    | ?          |
| Jeong,2018              | -                                           | -                                       | +                                                         | +                                               | -                                        | -                                    | ?          |
| Kim,2003                | -                                           | -                                       | -                                                         | ?                                               | +                                        | +                                    | +          |
| Lauffenburger,2019      | +                                           | ?                                       | +                                                         | +                                               | +                                        | +                                    | +          |
| Liou,2014               | ?                                           | ?                                       | ?                                                         | +                                               | +                                        | +                                    | ?          |
| Mons,2013               | +                                           | -                                       | +                                                         | +                                               | +                                        | +                                    | +          |
| Nesari,2010             | +                                           | ?                                       | ?                                                         | ?                                               | +                                        | +                                    | +          |
| O'Connor,2014           | +                                           | +                                       | +                                                         | +                                               | +                                        | +                                    | +          |
| Oh,2003                 | ?                                           | ?                                       | ?                                                         | ?                                               | +                                        | +                                    | ?          |
| Rasmussen BSB,2015      | -                                           | -                                       | +                                                         | +                                               | -                                        | -                                    | ?          |
| Rasmussen OW,2016       | +                                           | +                                       | +                                                         | +                                               | +                                        | +                                    | +          |
| Rodríguez-Idígoras,2009 | -                                           | -                                       | ?                                                         | ?                                               | ?                                        | ?                                    | ?          |
| Shea,2005               | ?                                           | ?                                       | -                                                         | -                                               | +                                        | +                                    | +          |
| Song,2009               | +                                           | ?                                       | ?                                                         | +                                               | +                                        | +                                    | ?          |
| Walker,2011             | +                                           | ?                                       | -                                                         | ?                                               | +                                        | +                                    | +          |
| Whitlock,2000           | ?                                           | ?                                       | ?                                                         | +                                               | +                                        | +                                    | ?          |
